# Supplementary material
Source: PubMed Central journal article supplement (PMC2613740)
Supplement: pp.108.126276_1.pdf [file pp.108.126276_1.pdf]

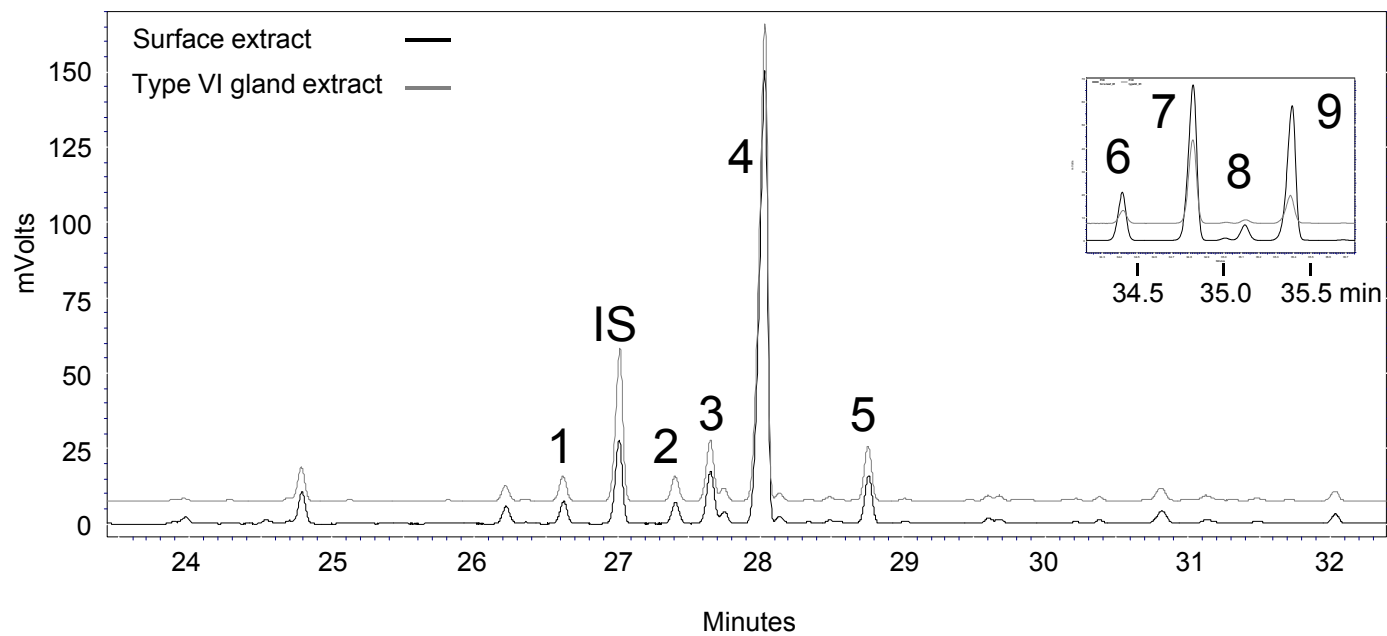

**Supplemental Figure S1.** Terpenoid accumulation in type VI trichomes of *S. habrochaites* LA1777. Overlay of GC chromatograms (TIC) of extracts from leaf surface (black) and type VI glands (grey). Inset: Separate chromatograms of TMCS-derivatized cII-SCAs. IS, internal standard (tetradecane); 1,  $\beta$ -elemene; 2,  $\alpha$ -cis-bergamotene; 3,  $\alpha$ -cis-santalene; 4,  $\gamma$ -elemene; 5, unknown; 6,  $\alpha$ -cis-bergamotenoic acid; 7,  $\alpha$ -cis-santalenoic acid; 8,  $\alpha$ -trans-bergamotenoic acid; 9,  $\beta$ -cis-bergamotenoic acid.
