# Supplementary material
Source: PubMed Central journal article supplement (PMC2613740)
Supplement: pp.108.126276_4.pdf [file pp.108.126276_4.pdf]

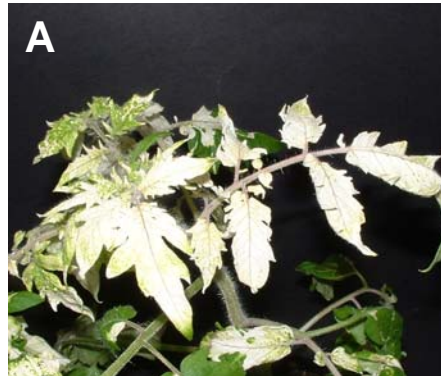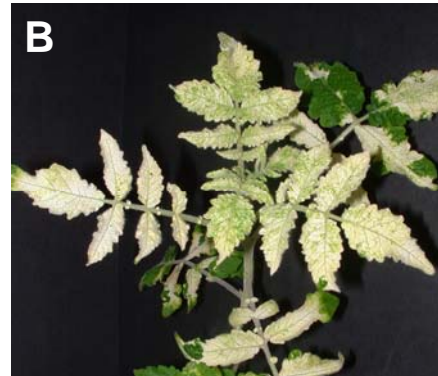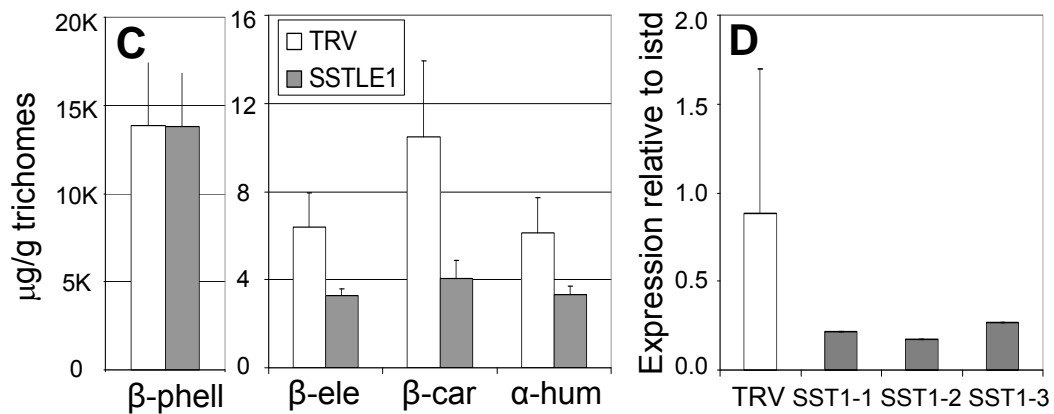

**Supplemental Figure S4.** VIGS as a tool for the analysis of gene function in tomato species and trichomes.

A and B, Effects of *PDS*-silencing on shoots of *S. lycopersicum* (A) and LA1777 (B). C, Trichome terpenoid accumulation of *SSTLE1*-silenced tomato plants and controls;  $\beta$ -phell,  $\beta$ -phellandrene;  $\beta$ -ele,  $\beta$ -elemene;  $\beta$ -car,  $\beta$ -caryophyllene;  $\alpha$ -hum,  $\alpha$ -humulene. Values represent averages and SD of three replicates. D, Expression of *SSTLE1* in the trichomes of empty vector controls (TRV) and three silenced plants (SST1-1 to -3; same plants as in C). Gene expression was measured by real-time PCR relative to an internal standard (istd, actin). Bars represent average and SD for three controls and single values for individual plants.
