# Supplementary material
Source: PubMed Central journal article supplement (PMC2613740)
Supplement: pp.108.126276_7.pdf [file pp.108.126276_7.pdf]

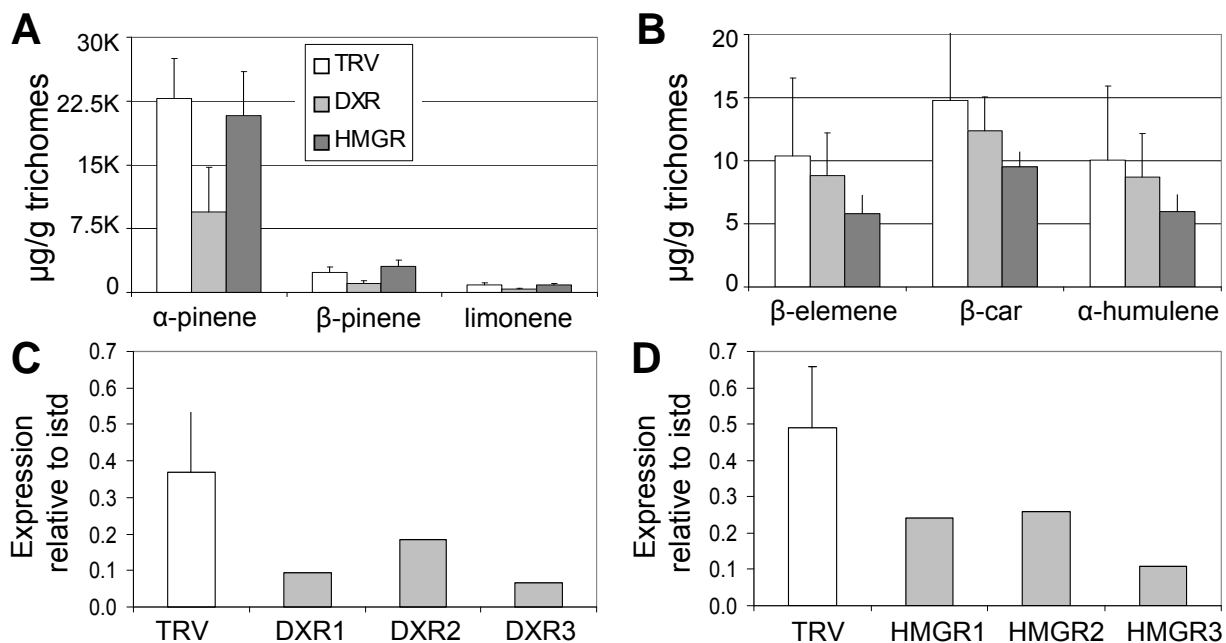

**Supplemental Figure S7.** Effects of variations in MEP and MVA pathway activity on terpenoid accumulation in *S. lycopersicum* cv. MicroTom trichomes.

A and B, Effects of silencing *DXR* (light grey bars) and *HMGR* (dark grey bars) compared to empty vector controls (TRV, white bars) on accumulation of monoterpenes (A) and sesquiterpenes (B) in the trichomes of *S. lycopersicum* cv. MicroTom. β-car, β-caryophyllene. Values represent averages of triplicates and SD. C and D, Expression levels of *DXR* (C) and *HMGR* (D) in control and silenced cv. MicroTom plants (same plants as in A and B). Gene expression was measured by real-time PCR relative to an internal standard (istd, actin). TRV, empty vector controls; DXR1-3 and HMGR1-3, three *DXR*- and *HMGR*-silenced plants, respectively. Bars represent average and SD for three controls and single values for individual plants. A repeat experiment gave similar results.
