# Supplementary material
Source: PubMed Central journal article supplement (PMC2613740)
Supplement: pp.108.126276_8.pdf [file pp.108.126276_8.pdf]

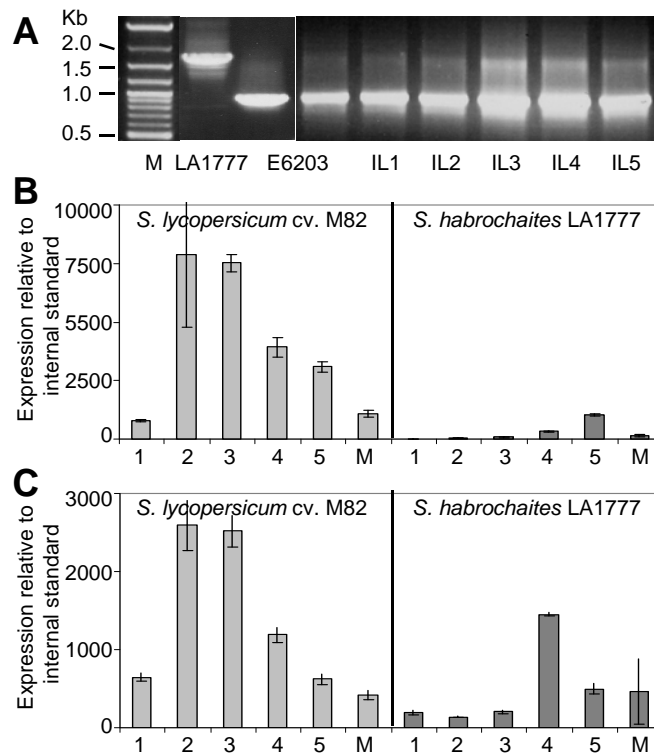

**Supplemental Figure S8.** Evaluation of a putative role for *SSTLH3* in cll-S production by genetic and gene expression analyses.

A, Amplification of a genomic fragment containing an insertion in the LA1777 allele of *SSTLH3* in LA1777, *S. lycopersicum* cv. E6302 and five cll-S-producing introgression lines of LA1777 in cv. E6203 background. M, DNA marker; IL1, LA3959; IL2, LA3937; IL3, LA3914; IL4, LA3940; IL5, LA3954. B, Expression of *SSTLH3* in the trichomes of stem internodes in *S. lycopersicum* cv. M82 and LA1777 measured by real-time PCR relative to an internal standard (actin); see Supplemental Table S2 for respective Ct values. Each bar represents a pool of trichome RNA derived from three to six plants and SD for three technical replicates. 1-5, first to fifth internode from apex; M, internodes from the mid-section of the stem. C, repeat experiment of B.
